# Supplementary material
Source: publisher figshare collection journal article supplement (https://gsapubs.figshare.com/ndownloader/files/25541729)
Supplement: Supplementary file 1 [file 25541729]

## Sheet: Tabelle1
DR8: Full fayalite EPMA data set
Sample	V6 605m
Analysis	7	8	9	10	11	12	13	14	15	16	17	18	19	20	21	22	23	24	25	26		27	28	29	30	31	32	33	34	35	36		37	38	39	40	41	42	43	44	45	46		47	48	49	50	51	52
Grain	Fa6	Fa6	Fa6	Fa6	Fa6	Fa6	Fa6	Fa6	Fa6	Fa6	Fa6	Fa6	Fa6	Fa6	Fa6	Fa6	Fa6	Fa6	Fa6	Fa6		Fa5	Fa5	Fa5	Fa5	Fa5	Fa5	Fa5	Fa5	Fa5	Fa5		Fa5-2	Fa5-2	Fa5-2	Fa5-2	Fa5-2	Fa5-2	Fa5-2	Fa5-2	Fa5-2	Fa5-2		Fa7	Fa7	Fa7	Fa7	Fa7	Fa7
Point	1	2	3	4	5	6	7	8	9	10	11	12	13	14	15	16	17	18	19	20		1	2	3	4	5	6	7	8	9	10		1	2	3	4	5	6	7	8	9	10		1	2	3	4	5	6
Texture	cumulus	cumulus	cumulus	cumulus	cumulus	cumulus	cumulus	cumulus	cumulus	cumulus	cumulus	cumulus	cumulus	overgrowth	overgrowth	overgrowth	overgrowth	overgrowth	overgrowth	overgrowth		cumulus	cumulus	cumulus	cumulus	cumulus	cumulus	cumulus	cumulus	cumulus	cumulus		cumulus	cumulus	cumulus	cumulus	cumulus	cumulus	cumulus	cumulus	cumulus	cumulus		intercumulus	intercumulus	intercumulus	intercumulus	intercumulus	intercumulus
SiO2	29.358	30.294	30.352	30.288	30.247	30.336	30.089	30.269	30.188	30.15	30.239	30.126	30.448	30.265	30.041	29.906	29.778	30.064	29.951	29.942		28.995	30.02	29.727	30.074	29.789	29.77	29.636	29.456	29.439	29.416		29.114	29.422	28.91	29.154	29.932	29.785	28.92	28.977	29.017	29.072		29.515	28.467	28.66	29.606	30.103	29.605
TiO2	0.02	0.009	0	0	0	0	0	0	0	0	0.01	0.03	0.008	0	0	0	0	0	0	0		0	0	0	0	0.002	0.029	0	0	0	0.004		0	0	0	0	0	0	0	0.011	0	0		0	0	0	0	0	0
Al2O3	0.011	0.001	0.024	0.002	0	0	0.003	0.004	0	0	0.006	0	0.007	0	0	0	0.006	0	0.01	0		0.005	0.013	0.016	0.005	0.006	0.03	0.002	0.006	0.005	0.011		0.004	0.012	0	0	0	0	0	0.007	0.001	0		0.022	0.003	0	0	0	0.008
Cr2O3	0.004	0.008	0	0.003	0	0	0.018	0	0.004	0.002	0	0	0	0.006	0	0	0.001	0	0	0		0	0	0	0	0	0	0	0	0	0		0.007	0.013	0.001	0	0.014	0	0	0	0	0		0.028	0	0	0	0	0
V2O3	0	0	0	0	0	0	0	0	0	0	0	0	0	0	0	0	0	0	0	0		0	0	0	0	0	0	0	0	0	0		0	0	0	0	0	0	0	0	0	0		0	0	0	0	0	0
FeO	68.332	67.846	67.819	68.238	68.112	68.004	68.255	68.024	68.263	68.29	67.435	67.966	67.527	68.074	67.602	68.196	67.896	67.553	67.573	67.617		67.77	68.144	68.407	68.098	67.64	67.94	68.515	68.189	68.143	67.362		67.69	68.152	68.313	68.466	68.976	68.611	67.919	67.998	67.961	67.906		68.381	67.907	67.944	68.155	67.722	67.818
MnO	1.496	1.496	1.47	1.417	1.389	1.521	1.429	1.485	1.432	1.486	1.397	1.486	1.455	1.458	1.546	1.476	1.587	1.636	1.556	1.583		1.629	1.569	1.487	1.532	1.482	1.462	1.437	1.542	1.501	1.491		1.57	1.422	1.348	1.405	1.425	1.429	1.521	1.576	1.566	1.564		1.489	1.51	1.549	1.549	1.486	1.49
MgO	0.514	0.564	0.507	0.546	0.589	0.559	0.581	0.579	0.61	0.581	0.583	0.58	0.606	0.583	0.501	0.526	0.525	0.573	0.517	0.564		0.566	0.492	0.535	0.551	0.524	0.525	0.562	0.545	0.532	0.516		0.503	0.489	0.527	0.512	0.516	0.514	0.55	0.517	0.487	0.507		0.575	0.51	0.535	0.54	0.556	0.575
NiO	0	0	0	0	0.017	0.005	0.002	0	0	0.008	0	0.007	0	0.001	0	0.006	0	0	0	0.013		0.02	0.021	0.002	0	0.046	0	0	0	0	0.013		0.002	0.015	0.01	0.002	0	0.017	0.012	0	0.034	0		0	0.023	0.001	0.003	0.014	0.022
CaO	0.209	0.209	0.148	0.172	0.161	0.146	0.165	0.126	0.139	0.111	0.142	0.145	0.177	0.296	0.333	0.262	0.3	0.292	0.278	0.317		0.255	0.233	0.201	0.201	0.164	0.152	0.148	0.206	0.22	0.282		0.218	0.195	0.098	0.091	0.097	0.144	0.18	0.326	0.362	0.359		0.256	0.262	0.269	0.302	0.326	0.267
total	99.944	100.427	100.32	100.666	100.515	100.571	100.542	100.487	100.636	100.628	99.812	100.34	100.228	100.683	100.023	100.372	100.093	100.118	99.885	100.036		99.24	100.492	100.375	100.461	99.653	99.908	100.3	99.944	99.84	99.095		99.108	99.72	99.207	99.63	100.96	100.5	99.102	99.412	99.428	99.408		100.266	98.682	98.958	100.155	100.207	99.785
Oxygen	4	4	4	4	4	4	4	4	4	4	4	4	4	4	4	4	4	4	4	4		4	4	4	4	4	4	4	4	4	4		4	4	4	4	4	4	4	4	4	4		4	4	4	4	4	4
Formula
Si	0.993791	1.02547	1.02744	1.02527	1.02388	1.0269	1.01854	1.02463	1.02189	1.0206	1.02361	1.01979	1.03069	1.02449	1.01691	1.01234	1.00801	1.01769	1.01386	1.01356		0.981503	1.0162	1.00628	1.01803	1.00838	1.00774	1.0032	0.997108	0.996533	0.995754		0.985531	0.995957	0.978625	0.986885	1.01322	1.00824	0.978964	0.980893	0.982247	0.984109		0.999105	0.96363	0.970163	1.00219	1.01901	1.00215
Ti	0.000509202	0.000229141	0	0	0	0	0	0	0	0	0.000254601	0.000763803	0.000203681	0	0	0	0	0	0	0		0	0	0	0	5.09202e-05	0.000738343	0	0	0	0.00010184		0	0	0	0	0	0	0	0.000280061	0	0		0	0	0	0	0	0
Al	0.000438825	3.98932e-05	0.000957436	7.97863e-05	0	0	0.000119679	0.000159573	0	0	0.000239359	0	0.000279252	0	0	0	0.000239359	0	0.000398932	0		0.000199466	0.000518611	0.000638291	0.000199466	0.000239359	0.00119679	7.97863e-05	0.000239359	0.000199466	0.000438825		0.000159573	0.000478718	0	0	0	0	0	0.000279252	3.98932e-05	0		0.00087765	0.000119679	0	0	0	0.000319145
Cr	0.000107047	0.000214093	0	8.0285e-05	0	0	0.00048171	0	0.000107047	5.35234e-05	0	0	0	0.00016057	0	0	2.67617e-05	0	0	0		0	0	0	0	0	0	0	0	0	0		0.000187332	0.000347902	2.67617e-05	0	0.000374663	0	0	0	0	0		0.000749327	0	0	0	0	0
V	0	0	0	0	0	0	0	0	0	0	0	0	0	0	0	0	0	0	0	0		0	0	0	0	0	0	0	0	0	0		0	0	0	0	0	0	0	0	0	0		0	0	0	0	0	0
Fe2+	1.93417	1.92042	1.91965	1.93151	1.92795	1.92489	1.932	1.92546	1.93222	1.93299	1.90878	1.92381	1.91139	1.92687	1.91351	1.93033	1.92183	1.91212	1.91269	1.91394		1.91827	1.92885	1.9363	1.92755	1.91459	1.92308	1.93935	1.93013	1.92882	1.90672		1.916	1.92908	1.93364	1.93797	1.9524	1.94207	1.92248	1.92472	1.92367	1.92212		1.93556	1.92214	1.92319	1.92916	1.91691	1.91963
Mn	0.0428883	0.0428883	0.0421429	0.0406235	0.0398207	0.043605	0.0409675	0.0425729	0.0410535	0.0426016	0.0400501	0.0426016	0.0417129	0.0417989	0.0443217	0.0423149	0.0454971	0.0469019	0.0446084	0.0453825		0.0467012	0.0449811	0.0426303	0.0439204	0.0424869	0.0419136	0.0411968	0.044207	0.0430316	0.0427449		0.0450098	0.0407668	0.0386453	0.0402794	0.0408528	0.0409675	0.043605	0.0451818	0.0448951	0.0448378		0.0426876	0.0432897	0.0444077	0.0444077	0.0426016	0.0427163
Mg	0.0259392	0.0284625	0.0255859	0.0275541	0.0297241	0.0282101	0.0293204	0.0292194	0.0307839	0.0293204	0.0294213	0.0292699	0.030582	0.0294213	0.0252831	0.0265448	0.0264943	0.0289166	0.0260906	0.0284625		0.0285634	0.024829	0.026999	0.0278064	0.0264438	0.0264943	0.0283615	0.0275036	0.0268476	0.0260401		0.0253841	0.0246776	0.0265952	0.0258383	0.0260401	0.0259392	0.0277559	0.0260906	0.0245766	0.0255859		0.0290176	0.0257373	0.026999	0.0272513	0.0280587	0.0290176
Ni	0	0	0	0	0.000462897	0.000136146	5.44585e-05	0	0	0.000217834	0	0.000190605	0	2.72293e-05	0	0.000163376	0	0	0	0.00035398		0.000544585	0.000571815	5.44585e-05	0	0.00125255	0	0	0	0	0.00035398		5.44585e-05	0.000408439	0.000272293	5.44585e-05	0	0.000462897	0.000326751	0	0.000925795	0		0	0.000626273	2.72293e-05	8.16878e-05	0.00038121	0.000599044
Ca	0.00757943	0.00757943	0.00536725	0.00623762	0.0058387	0.00529472	0.00598376	0.00456942	0.00504087	0.00402544	0.00514966	0.00525846	0.00641894	0.0107345	0.0120763	0.00950149	0.0108796	0.0105894	0.0100817	0.0114961		0.00924763	0.0084498	0.00728931	0.00728931	0.0059475	0.00551231	0.00536725	0.00747064	0.00797835	0.0102268		0.00790582	0.00707172	0.00355399	0.00330014	0.00351773	0.00522219	0.00652774	0.0118225	0.013128	0.0130192		0.0092839	0.00950149	0.00975534	0.0109521	0.0118225	0.00968281
total	3.00543	3.02531	3.02115	3.03136	3.02768	3.02903	3.02746	3.02661	3.03109	3.02981	3.00751	3.02169	3.02127	3.03351	3.0121	3.02119	3.01298	3.01622	3.00773	3.01319		2.98503	3.0244	3.02019	3.02479	2.99939	3.00667	3.01756	3.00666	3.00341	2.98238		2.98023	2.99879	2.98136	2.99432	3.03641	3.02291	2.97966	2.98927	2.98949	2.98967		3.01728	2.96505	2.97454	3.01404	3.01878	3.00411
Endmember
Fa	96.1998	96.0522	96.3319	96.2902	96.2149	96.1418	96.1995	96.1854	96.1735	96.2091	96.2377	96.1362	96.0447	95.919	95.9061	96.0911	95.8662	95.6764	95.9477	95.7145		95.7542	96.0735	96.1767	96.0621	96.1757	96.2984	96.2803	96.0593	96.1201	96.0039		96.0712	96.3574	96.5513	96.5393	96.5192	96.3968	96.0906	95.8614	95.8387	95.8394		95.9838	96.0448	95.9494	95.8897	95.8563	95.9026
Fo	1.29013	1.42359	1.28395	1.37363	1.48339	1.409	1.45994	1.45964	1.53222	1.45934	1.48337	1.46266	1.5367	1.46458	1.2672	1.32139	1.32161	1.44689	1.3088	1.42339		1.4258	1.2367	1.34105	1.38577	1.32836	1.32671	1.40802	1.36881	1.33791	1.31113		1.27279	1.23264	1.32797	1.28712	1.28732	1.28752	1.38731	1.29945	1.22442	1.27575		1.43897	1.28603	1.347	1.35453	1.4031	1.44969
Te	2.13313	2.14511	2.11481	2.02517	1.98727	2.17792	2.03989	2.12671	2.04338	2.12038	2.01926	2.12887	2.09602	2.08073	2.22143	2.10643	2.26952	2.34682	2.23772	2.26954		2.33119	2.24045	2.11746	2.18883	2.13425	2.09883	2.04524	2.20011	2.14442	2.15222		2.25686	2.0363	1.92966	2.00651	2.0196	2.03347	2.17949	2.2503	2.2367	2.23567		2.11686	2.16308	2.21553	2.2073	2.13032	2.13406
[truncated: 254 more columns]

## Sheet: G48417
Brandt, S., et al., 2021, Cumulate olivine: A novel host for heavy rare earth element mineralization: Geology, v. 49, p. XXX–XXX, https://doi.org/10.1130/G48417.1
